1 Divergence of wastewater SARS-CoV-2 and reported laboratory-confirmed COVID-19 incident  
2 case data coincident with wide-spread availability of at-home COVID-19 antigen tests

3  
4 Alexandria B. Boehm<sup>1\*</sup>, Marlene K. Wolfe<sup>2</sup>, Bradley J. White<sup>3</sup>, Bridgette Hughes<sup>3</sup>, Dorothea  
5 Duong<sup>3</sup>

- 6  
7  
8 1. Department of Civil & Environmental Engineering, School of Engineering and Doerr  
9 School of Sustainability, Stanford University, 473 Via Ortega, Stanford, CA, USA 94305  
10 2. Gangarosa Department of Environmental Health, Rollins School of Public Health, Emory  
11 University, 1518 Clifton Rd, Atlanta, GA, USA, 30322  
12 3. Verily Life Sciences LLC, South San Francisco, CA, USA, 94080  
13

14  
15  
16 \* Author to whom correspondence should be addressed. Email: [aboehm@stanford.edu](mailto:aboehm@stanford.edu), Tel:  
17 650-724-9128  
18

## 19 **Abstract**

20 Concentrations of SARS-CoV-2 RNA in wastewater settled solids from publicly owned treatment  
21 works (POTWs) historically correlated strongly with laboratory confirmed incident COVID-19  
22 case data. With the increased availability of at-home antigen tests since late 2021 and early  
23 2022, laboratory test availability and test seeking behavior has decreased. In the United States,  
24 the results from at-home antigen tests are not typically reportable to public health agencies and  
25 thus are not counted in case reports. As a result, the number of reported laboratory-confirmed  
26 incident COVID-19 cases has decreased dramatically, even during times of increased test  
27 positivity rates and wastewater concentrations of SARS-CoV-2 RNA. Herein, we tested whether  
28 the correlative relationship between wastewater concentrations of SARS-CoV-2 RNA and  
29 reported laboratory-confirmed COVID-19 incidence rate has changed since 1 May 2022, a point  
30 in time immediately before the onset of the BA.2/BA.5 surge, the first surge to begin after at-  
31 home antigen test availability was high in the region. We used daily data from three POTWs in  
32 the Greater San Francisco Bay Area of California, USA for the analysis. We found that although  
33 there is a significant positive association between wastewater measurements and incident rate  
34 data collected after 1 May 2022, the parameters describing the relationship are different than  
35 those describing the relationship between the data collected prior to 1 May 2022. If laboratory  
36 test seeking or availability continues to change, the relationship between wastewater and  
37 reported case data will continue to change. Results suggests that, assuming SARS-CoV-2 RNA  
38 shedding remains relatively stable among those infected with the virus as different variants  
39 emerge, that wastewater concentrations of SARS-CoV-2 RNA can be used to estimate COVID-  
40 19 cases as they would have been during the time when laboratory testing availability and test  
41 seeking behavior were at a high (here, before 1 May 2022) using the historical relationship  
42 between SARS-CoV-2 RNA and COVID-19 case data.  
43

44

45

## 46 **Introduction**

47 Concentrations of genetic material from various viruses in wastewater solids collected from  
48 publicly owned treatment works (POTWs) correlate well with clinical testing data on disease  
49 occurrence<sup>1-3</sup>. SARS-CoV-2 RNA concentrations in wastewater solids have been shown to  
50 correlate strongly with laboratory-confirmed cases of COVID-19<sup>4-6</sup>. Similarly, concentrations of  
51 influenza A and B, RSV, metapneumovirus, parainfluenza, rhinovirus, seasonal coronaviruses,  
52 and mpox nucleic acids in POTW wastewater solids correlate well with clinical sample percent  
53 positivity rates and/or reported disease incidence in the contributing communities<sup>2,3,7-9</sup>.

54

55 Wastewater is a less biased approach than clinical testing for gaining insight to community  
56 health as it represents a composite biological sample containing contributions from the entire  
57 contributing population. Human excretions including feces, urine, sputum, saliva, and mucus are  
58 present in wastewater. Viruses and their genetic material adsorb to solids in the wastestream  
59 and as a result, their concentrations are enriched orders of magnitude in the solids compared to  
60 the liquid phase of wastewater<sup>5,9-12</sup>. Therefore, solids represent a natural concentrator of virus  
61 in wastewater and an ideal matrix for measuring their concentrations for wastewater-based  
62 epidemiology.

63

64 Our and others' previous work showed strong correlations between SARS-CoV-2 RNA  
65 concentrations in wastewater and laboratory-confirmed COVID-19 case data<sup>13-18</sup>. This work  
66 was primarily completed before the emergence of the Omicron variant, and used COVID-19  
67 case data compiled by public health departments, almost entirely reliant on testing of patient  
68 specimens performed in clinical laboratories. The emergence of Omicron occurred at the same  
69 time at-home antigen tests were first made available by the United States federal government  
70 free of charge on 16 January 2022 (at the height of the Omicron BA.1 surge)<sup>19</sup>. The results of  
71 at-home antigen tests are not typically reportable to public health agencies so their positive  
72 results are not recorded in public health databases<sup>20</sup>.

73

74 The goal of the present study is to compare the relationship between SARS-CoV-2 RNA  
75 concentrations measured in POTW wastewater solids to reported laboratory-confirmed COVID-  
76 19 incident cases before and after at-home antigen tests were widely available. Daily  
77 concentrations of SARS-CoV-2 from three large POTWs located in the Greater San Francisco  
78 Bay Area of California, USA are used for the analysis, along with publicly available data on  
79 incident laboratory-confirmed COVID-19 cases and laboratory test positivity rates.

80

## 81 **Methods**

82

83 The study was reviewed by the IRB at Stanford University and the IRB has determined that this  
84 research does not involve human subjects as defined in 45 CFR 46.102(f) and therefore does  
85 not require IRB oversight.

86

87 **Study sites.** Daily samples between 1 December 2020 and 16 January 2023 of wastewater  
88 settled solids were obtained from three publicly owned treatment works (POTWs) San Jose (SJ)  
89 Oceanside (OS), and Sacramento (SAC) serving populations in Santa Clara County, San  
90 Francisco County, and Sacramento County, California USA, respectively. The plants serve 1.5  
91 million, 250,000, and 1.5 million people, respectively, representing 77%, 30%, and 93% of their  
92 county populations, respectively. Detailed methods for sample collection have been presented  
93 elsewhere<sup>14,21-24</sup>. In brief, grab samples of solids were collected from the primary clarifier daily in  
94 sterile containers and placed at 4°C and couriered to the laboratory where they were processed  
95 immediately. A total of 777, 737, and 769 samples were included in this study from SJ, OS, and  
96 SAC, respectively. Note that a subset of these data have already been published; in particular  
97 data from all three POTWs collected between 1 December 2020 and 31 March 2021 was  
98 previously published by Wolfe et al.<sup>14</sup> and data between 1 January 2022 and 13 April 2022 were  
99 published by Boehm et al.<sup>25</sup>. Otherwise, the data presented herein has not been previously  
100 published.

101  
102 **Laboratory analyses.** Samples were processed the same day they were collected in the  
103 laboratory to measure concentrations of SARS-CoV-2 N gene and an internal endogenous  
104 control pepper mild mottle virus (PMMoV). The methods are detailed in other peer-reviewed  
105 publications<sup>14,21</sup> and available on protocols.io<sup>21-23</sup>. The N gene target is conserved across  
106 SARS-CoV-2 variants to date. In brief, the samples were centrifuged to dewater the solids,  
107 resuspended in a buffer spiked with an exogenous viral control (bovine coronavirus, BCoV),  
108 homogenized, and then centrifuged. Nucleic-acids were extracted and purified from the  
109 supernatant using a commercial kit and then the RNA extract was subjected to an inhibitor  
110 removal step. The resultant RNA was used immediately as template in reverse-transcription  
111 polymerase chain reactions (RT-PCR) in a digital droplet format to measure the SARS-CoV-2 N  
112 gene, PMMoV, and BCoV. Positive and negative extraction and RT-PCR controls were included  
113 in all runs, and we ensured that BCoV recovery was greater than 10% in all samples. Previous  
114 work showed that inhibition using this method was not present<sup>24</sup>. Results for SARS-CoV-2 N  
115 gene and PMMoV are reported as copies of target per dry weight of solids. Wastewater data are  
116 available through the Stanford Digital Repository (<https://doi.org/10.25740/xy132dg9314>).

117  
118 **Case data.** Publicly available data on the laboratory-confirmed incidence rate and test positivity  
119 rate for Santa Clara, San Francisco, and Sacramento Counties are available online  
120 (<https://data.chhs.ca.gov/dataset/covid-19-time-series-metrics-by-county-and-state>). Incidence  
121 rates for populations served by specific POTWS (for each sewershed) were provided by  
122 California Department of Public Health. Incidence and positivity rate data are reported as a  
123 function of the “episode date” which is the earliest reported date associated with the specimen  
124 (symptom onset, collection, hospitalization, or death; but usually specimen collection date) and  
125 include results of nucleic-acid amplification tests (hereafter, “PCR tests”). Seven-day smoothed  
126 incidence and positivity rate data are used to represent incidence and positivity rate hereafter,  
127 because it is well understood that these data have substantial day-of-week effects<sup>26</sup>.

128  
129 **Statistical analysis.** We used Pearson’s r to test for linear relationships between sewershed-  
130 aggregated and county-aggregated incidence rate data for each POTW (three tests total). We

131 used Kendall's tau to test for association between county-aggregated positivity and incidence  
132 rates for each POTW (three tests). We used Kendall's tau to test for association between  
133 wastewater and clinical case data sets. We tested for associations between measured N,  
134 N/PMMoV, 5-d trimmed average N, and 5-d trimmed N/PMMoV, and incidence rate and  
135 positivity rates for each POTW resulting in twenty-four Kendall's tau tests. We chose Kendall's  
136 tau as it does not require that data are normally distributed and therefore did not require data  
137 transformation; however, results are unchanged if other tests of association are used.

138  
139 We tested whether the relationship between wastewater measurements of SARS-CoV-2 RNA  
140 and incidence rate differed for data collected before, and after 1 May 2022 using the following  
141 linear model:

$$142 \quad Y = b + m \cdot X + n \cdot D + k \cdot (D \cdot X) \quad (\text{Eq. 1})$$

143 where Y is log<sub>10</sub>-transformed 7-day smoothed incidence rate data aggregated at the county  
144 where the POTW is located, X is the log<sub>10</sub>-transformed 5-d trimmed average N/PMMoV, D is a  
145 categorical, binary variable indicating whether the date is after 1 May 2022 (D = 0 if the date is  
146 before 1 May 2022, and 1 if it is on or after this date), b is the intercept, m is the coefficient on X,  
147 n is the coefficient on D, and k is the coefficient on the interaction term D·X. We chose 1 May  
148 2022 as the date to bifurcate the data since this date occurs at the onset of the BA.2/BA.5  
149 COVID-19 case surge in this region. This represents the first surge that began after at-home  
150 antigen tests became widely available in the region. We confirmed via visual examination that  
151 this date represented approximately when the relationship between incidence rate and  
152 wastewater concentrations appeared to change (see results).

153  
154 The model was applied to each sewershed (model was run three times). We chose to use the 5-  
155 d trimmed average wastewater concentration as it eliminates the influence of intrinsic variability  
156 associated with measurements from a complex, environmental matrix; and we chose to use  
157 N/PMMoV as PMMoV normalization can control for variation in RNA extraction efficiency and  
158 fecal strength of the solids<sup>14,27,28</sup>. However, we explored whether using raw data (not 5-d  
159 trimmed averages) and unnormalized N gene concentrations as X in the model, and results  
160 were generally unchanged.

161  
162 Using Eq. 1, we tested whether the relationship between positivity and incidence rate was  
163 different for data collected before, and after 1 May 2022. In that application, Y = log<sub>10</sub>-  
164 transformed incidence rate, and X = log<sub>10</sub>-transformed positivity rate. The model was applied to  
165 each sewershed (model was run 3 times).

166  
167 We confirmed the Eq. 1 model residuals were approximately normal. All statistical analyses  
168 were carried out in R studio (Version 1.4.1106) using R (Version 4.0.5). We used alpha = 0.05  
169 which corresponds to a p value of 0.0013 with a Bonferroni correction (0.05/36 tests).

## 170 171 **Results**

172  
173 Positive and negative RT-PCR and nucleic-acid extraction controls were positive and negative,  
174 respectively, indicating assays performed well and there was no contamination during sample

175 pre-analytical and analytical processing. BCoV recovery was greater than 10% (median across  
176 samples from each POTW was 80%), and PMMoV concentrations were fairly consistent across  
177 samples (median  $\pm$  interquartile range of  $9.0 \times 10^8 \pm 4.3 \times 10^8$  cp/g (SAC),  $5.2 \times 10^8 \pm 3.4 \times 10^8$  cp/g  
178 (OS), and  $1.5 \times 10^9 \pm 6.0 \times 10^8$  cp/g (SJ)) indicating reasonable RNA extraction efficiency and fairly  
179 consistent fecal strength of wastewater (Figure S1). We previously published details related to  
180 the dMIQE<sup>29</sup> and EMMI<sup>30</sup> guidelines for these measurements<sup>14,25</sup>.

181  
182 Sewershed-aggregated incidence rates correlate strongly with county-level incidence rates  
183 (Pearson's  $r$  of 1.00 for SJ, 0.99 for OS, and 0.93 for SAC,  $p < 10^{-15}$  for all). We use county-  
184 aggregated incidence rate hereafter to represent sewershed-aggregated incidence rate given  
185 their high correlations, because the county-aggregated data are publicly available and can be  
186 shared readily. Positivity rate aggregated at the sewershed is not available, so we used county-  
187 aggregated positivity rate as a proxy for the sewershed given the high degree of correlation  
188 between county and sewershed-aggregated incidence rate.

189  
190 Across all three sewersheds, SARS-CoV-2 N gene concentrations, and those concentrations  
191 normalized by PMMoV (raw and 5-day trimmed averages) were positively and significantly  
192 correlated to county-aggregated COVID-19 incidence rate, and county-aggregated positivity rate  
193 (Kendall's tau between 0.51 and 0.62,  $p < 10^{-15}$  for correlations with incidence rate, and Kendall's  
194 tau between 0.68 and 0.80,  $p < 10^{-15}$  for correlations with positivity rate), consistent with  
195 previously published work<sup>4,6,17,31</sup>. The ranges reported in the previous sentence include tau  
196 calculated with the four considered wastewater variables for the three plants.

197  
198 County-aggregated incidence rate and positivity rate are well correlated (Kendall's tau 0.79 for  
199 SAC, 0.96 for SJ, 0.88 for OS, all  $p < 10^{-15}$ ), but there is a change in their relationship starting  
200 approximately 1 May 2022, at the onset of the BA.2/BA.5 surge (Figure S2). A multiple  
201 regression model was used to test whether the relationship between positivity rate and  
202 incidence rate was significantly different before and after 1 May 2022 at each of the considered  
203 counties, and those models indicated that the relationship was significantly different before and  
204 after 1 May 2022 with different slope and/or intercepts (Table S1).

205  
206 When  $\log_{10}$ -transformed incidence rate and positivity rate are plotted against  $\log_{10}$ -transformed,  
207 5-d trimmed average wastewater concentrations of SARS-CoV-2 N gene normalized by PMMoV  
208 at the three sewersheds, the data generally fall on a single line (Figures 1 - 3). However, data  
209 collected starting approximately 1 May 2022 fall off the line represented by data collected before  
210 1 May 2022 on the incidence rate - wastewater plot; the same pattern is not evident on the  
211 positivity rate - wastewater plot (Figures 1-3). The relationship between  $\log_{10}$ -transformed  
212 incidence rate and  $\log_{10}$ -transformed N/PMMoV concentrations collected after 1 May 2022  
213 appears approximately linear, but it is visually offset from earlier measurements.

214  
215 Using multiple linear regression, we tested whether the linear relationship between  $\log_{10}$ -  
216 transformed incidence rate and  $\log_{10}$ -transformed 5-d trimmed average N/PMMoV is the same  
217 for data collected before and after 1 May 2022. All models were statistically significant with  
218 adjusted  $R^2$  values between 0.81 and 0.86 ( $p < 10^{-15}$ ). For SAC, the slope of the relationship



219 between the two variables is not different for data collected before and after 1 May 2022 (slope  
220 = 0.88) but the intercept is different (-0.26 compared to -0.87 for data collected before and after  
221 1 May 2022, respectively). For SJ, the slope of the relationship between the two variables is not  
222 different for data collected before and after 1 May 2022 (slope = 0.96); but the intercept is  
223 different (0.29 compared to -0.66 before and after 1 May 2022, respectively). For OS, both the  
224 slope and the intercept of the relationship between incidence rate and wastewater are different  
225 for data collected before and after 1 May 2022 (slope = 0.65 and 0.35 for data before and after  
226 1 May 2022, respectively; intercept = -1.2 compared to -2.73 before and after 1 May 2022,  
227 respectively). Results reported here are summarized in Table 1. We repeated the modeling  
228 using N (both raw and 5-d trimmed averaged data) and raw N/PMMoV as the dependent  
229 variables (X in equation 1), and results were similar.

230  
231 As equation 1 describes the relationship between  $\log_{10}$ -transformed incident rates and 5-d  
232 trimmed N/PMMoV well, it implies that incident rate and N/PMMoV are related by a power law  
233 relationship where incident rate =  $10^{\text{intercept}}(\text{N/PMMoV})^{\text{slope}}$ .

## 234 235 **Discussion**

236  
237 In the Greater San Francisco Bay Area of California, USA, the BA.2/BA.5 COVID-19 case surge  
238 began around 1 May 2022 and represents the first surge in the region to begin after at-home  
239 antigen tests became widely available. The relationship between wastewater concentrations of  
240 SARS-CoV-2 RNA and laboratory-confirmed incidence rates of COVID-19 in the contributing  
241 community changed after 1 May 2022, likely a result of the change in regional PCR test seeking  
242 behaviors and testing availability. Because case data is likely underestimating the true cases in  
243 the community, this divergence indicates that wastewater may be particularly useful for  
244 obtaining a less biased estimate of community infection.

245  
246 The relationship between SARS-CoV-2 RNA concentrations and laboratory-confirmed incident  
247 cases has previously been described as a power-law relationship (i.e., it is linear on a log-log  
248 plot)<sup>1</sup>. We found that data collected both before and after 1 May 2022 at the three POTWs follow  
249 power-law relationships albeit with different parameter values. In particular, we found the slope  
250 of the log-log relationship to be similar for data collected before and after 1 May 2022 for two of  
251 the three POTWs, but the intercept to be different at all three. At all three POTWs, the intercept  
252 is smaller for data collected after 1 May 2022. This can be interpreted to mean that for data  
253 considered after 1 May 2022, that a one log-change in wastewater concentration indicates a  
254 log-change (between 0.35 and 0.96 log-change, depending on POTW) in incidence rates that is  
255 similar as to data presented before 1 May 2022 (between 0.65 and 0.96 log-change, depending  
256 on POTW), but a specific wastewater concentration corresponds to a lower observed incidence  
257 rate for data collected after 1 May 2022 than before 1 May 2022. This could be explained by  
258 fewer cases being reported through the public health case reporting system due to the  
259 increased use of at-home antigen tests, or decreased overall testing.

260  
261 The change in the relationship between wastewater concentrations of SARS-CoV-2 RNA and  
262 reported laboratory-confirmed COVID-19 incidence rates is likely a result of decreased PCR

263 test-seeking and availability, and increased availability of at-home COVID-19 antigen tests. It  
264 has been confirmed that PCR test seeking behavior has decreased as the availability of at-  
265 home antigen tests has increased<sup>20</sup>. Reduced test seeking behavior will bias the number of  
266 laboratory-confirmed cases downward but would not necessarily change the PCR testing  
267 positivity rate, so long as reduced test-seeking behavior is similar across all individuals including  
268 those who ultimately are infected and not infected with SARS-CoV-2. The similar relationship  
269 between SARS-CoV-2 RNA wastewater concentrations and laboratory-confirmed test positivity  
270 rate for data collected before and after 1 May 2022 would be consistent with this explanation.

271  
272 It is important to note that there are other potential reasons that the relationship between SARS-  
273 CoV-2 RNA wastewater concentrations and laboratory-confirmed COVID-19 incidence rates  
274 could change over time. The duration and magnitude of SARS-CoV-2 RNA shedding via human  
275 excretions that enter wastewater might change as different SARS-CoV-2 variants circulate<sup>32</sup>. To  
276 date, there are limited quantitative, externally valid data (i.e., measurements reported as  
277 concentrations with units of copies per mass or volume of excretion) on SARS-CoV-2 RNA in  
278 excretions among individuals infected with different variants, particularly with the newer variants  
279 that have emerged over the last year<sup>33,34</sup>. There is one study that inferred that the changing  
280 relationship between wastewater SARS-CoV-2 RNA concentration and case data between the  
281 Delta and Omicron surges in Arizona, USA was caused by changes in shedding<sup>35</sup>. Changes in  
282 severity of illness, or occurrence of asymptomatic infections may alter test seeking behavior,  
283 which would change case reporting, and yet is unrelated to the availability of at-home antigen  
284 tests.

285  
286 It is highly likely that the relationship between wastewater concentrations and laboratory-  
287 confirmed COVID-19 incidence rates will continue to change as PCR test seeking and test  
288 availability changes. For example, an official end of the COVID-19 public health emergency in  
289 the United States may make both clinical laboratory and at-home testing unaffordable or more  
290 difficult to obtain for some individuals. The work herein suggests that, assuming SARS-CoV-2  
291 RNA shedding remains relatively stable among those infected with the virus as different variants  
292 emerge, that wastewater concentrations of SARS-CoV-2 RNA can be used estimate COVID-19  
293 cases as they would have been during the time when PCR testing availability and test seeking  
294 behavior were at a high (here, before 1 May 2022) using the historical relationship between  
295 SARS-CoV-2 RNA and case data.

## 296 297 **Acknowledgements**

298 We thank Allegra Koch and Amanda Bidwell for assistance with literature reviews, and Vikram  
299 Chan-Herur for comments on the final draft. Numerous people contributed to sample collection  
300 and case data acquisition, including Regional San Environmental Laboratory and Scientific  
301 Research Section Personnel (Sac), Payal Sarkar (SJ) and plant operations staff at San Jose-  
302 Santa Clara Regional Wastewater Facility, Lily Chan (OS), and the Oceanside plant operations  
303 and laboratory personnel. This study was performed on the ancestral and unceded lands of the  
304 Muwekma Ohlone people. We pay our respects to them and their Elders, past and present, and  
305 are grateful for the opportunity to live and work here.

306 **Competing interests.** Bradley J. White, Dorothea Duong, and Bridgette Hughes are employees  
307 of Verily Life Sciences, LLC. There are no other competing interests.  
308

## 309 References

- 310
- 311 (1) Wolfe, M. K.; Archana, A.; Catoe, D.; Coffman, M. M.; Dorevich, S.; Graham, K. E.; Kim,  
312 S.; Grijalva, L. M.; Roldan-Hernandez, L.; Silverman, A. I.; Sinnott-Armstrong, N.; Vugia, D.  
313 J.; Yu, A. T.; Zambrana, W.; Wigginton, K. R.; Boehm, A. B. Scaling of SARS-CoV-2 RNA  
314 in Settled Solids from Multiple Wastewater Treatment Plants to Compare Incidence Rates  
315 of Laboratory-Confirmed COVID-19 in Their Sewersheds. *Environ. Sci. Technol. Lett.*  
316 **2021**. <https://doi.org/10.1021/acs.estlett.1c00184>.
  - 317 (2) Hughes, B.; Duong, D.; White, B. J.; Wigginton, K. R.; Chan, E. M. G.; Wolfe, M. K.;  
318 Boehm, A. B. Respiratory Syncytial Virus (RSV) RNA in Wastewater Settled Solids  
319 Reflects RSV Clinical Positivity Rates. *Environ. Sci. Technol. Lett.* **2022**, 9 (2), 173–178.  
320 <https://doi.org/10.1021/acs.estlett.1c00963>.
  - 321 (3) Wolfe, M. K.; Duong, D.; Bakker, K. M.; Ammerman, M.; Mortenson, L.; Hughes, B.; Arts,  
322 P.; Luring, A. S.; Fitzsimmons, W. J.; Bendall, E.; Hwang, C. E.; Martin, E. T.; White, B.  
323 J.; Boehm, A. B.; Wigginton, K. R. Wastewater-Based Detection of Two Influenza  
324 Outbreaks. *Environ. Sci. Technol. Lett.* **2022**, 9 (8), 687–692.  
325 <https://doi.org/10.1021/acs.estlett.2c00350>.
  - 326 (4) Peccia, J.; Zulli, A.; Brackney, D. E.; Grubaugh, N. D.; Kaplan, E. H.; Casanovas-Massana,  
327 A.; Ko, A. I.; Malik, A. A.; Wang, D.; Wang, M.; Warren, J. L.; Weinberger, D. M.; Omer, S.  
328 B. SARS-CoV-2 RNA Concentrations in Primary Municipal Sewage Sludge as a Leading  
329 Indicator of COVID-19 Outbreak Dynamics. *Nature Biotechnology* **2020**, 38, 1164–1167.
  - 330 (5) Graham, K. E.; Loeb, S. K.; Wolfe, M. K.; Catoe, D.; Sinnott-Armstrong, N.; Kim, S.;  
331 Yamahara, K. M.; Sassoubre, L. M.; Mendoza Grijalva, L. M.; Roldan-Hernandez, L.;  
332 Langenfeld, K.; Wigginton, K. R.; Boehm, A. B. SARS-CoV-2 RNA in Wastewater Settled  
333 Solids Is Associated with COVID-19 Cases in a Large Urban Sewershed. *Environ. Sci.*  
334 *Technol.* **2021**, 55 (1), 488–498. <https://doi.org/10.1021/acs.est.0c06191>.
  - 335 (6) D’Aoust, P. M.; Mercier, E.; Montpetit, D.; Jia, J.-J.; Alexandrov, I.; Neault, N.; Baig, A. T.;  
336 Mayne, J.; Zhang, X.; Alain, T.; Langlois, M.-A.; Servos, M. R.; MacKenzie, M.; Figeys, D.;  
337 MacKenzie, A. E.; Graber, T. E.; Delatolla, R. Quantitative Analysis of SARS-CoV-2 RNA  
338 from Wastewater Solids in Communities with Low COVID-19 Incidence and Prevalence.  
339 *Water Research* **2021**, 188, 116560. <https://doi.org/10.1016/j.watres.2020.116560>.
  - 340 (7) Mercier, E.; D’Aoust, P. M.; Thakali, O.; Hegazy, N.; Jia, J.-J.; Zhang, Z.; Eid, W.; Plaza-  
341 Diaz, J.; Kabir, M. P.; Fang, W.; Cowan, A.; Stephenson, S. E.; Pisharody, L.; MacKenzie,  
342 A. E.; Graber, T. E.; Wan, S.; Delatolla, R. Municipal and Neighbourhood Level  
343 Wastewater Surveillance and Subtyping of an Influenza Virus Outbreak. *Scientific Reports*  
344 **2022**, 12 (1), 15777. <https://doi.org/10.1038/s41598-022-20076-z>.
  - 345 (8) Boehm, A. B.; Hughes, B.; Doung, D.; Chan-Herur, V.; Buchman, A.; Wolfe, M. K.; White,  
346 B. J. Wastewater Surveillance of Human Influenza, Metapneumovirus, Parainfluenza,  
347 Respiratory Syncytial Virus (RSV), Rhinovirus, and Seasonal Coronaviruses during the  
348 COVID-19 Pandemic. *medRxiv* **2022**, 2022.09.22.22280218.  
349 <https://doi.org/10.1101/2022.09.22.22280218>.
  - 350 (9) Wolfe, M. K.; Yu, A. T.; Duong, D.; Rane, M. S.; Hughes, B.; Chan-Herur, V.; Donnelly, M.;  
351 Chai, S.; White, B. J.; Vugia, D. J.; Boehm, A. B. Use of Wastewater for Mpox Outbreak  
352 Surveillance in California. *N Engl J Med* **2023**. <https://doi.org/10.1056/NEJMc2213882>.
  - 353 (10) Kim, S.; Kennedy, L. C.; Wolfe, M. K.; Criddle, C. S.; Duong, D. H.; Topol, A.; White, B. J.;  
354 Kantor, R. S.; Nelson, K. L.; Steele, J. A.; Langlois, K.; Griffith, J. F.; Zimmer-Faust, A. G.;  
355 McLellan, S. L.; Schussman, M. K.; Ammerman, M.; Wigginton, K. R.; Bakker, K. M.;



- 356 Boehm, A. B. SARS-CoV-2 RNA Is Enriched by Orders of Magnitude in Primary Settled  
357 Solids Relative to Liquid Wastewater at Publicly Owned Treatment Works. *Environ. Sci.:*  
358 *Water Res. Technol.* **2022**. <https://doi.org/10.1039/D1EW00826A>.
- 359 (11) Ye, Y.; Ellenberg, R. M.; Graham, K. E.; Wigginton, K. R. Survivability, Partitioning, and  
360 Recovery of Enveloped Viruses in Untreated Municipal Wastewater. *Environ. Sci. Technol.*  
361 **2016**, *50* (10), 5077–5085. <https://doi.org/10.1021/acs.est.6b00876>.
- 362 (12) Yin, Z.; Voice, T.; Tarabara, V.; Xagorarakis, I. Sorption of Human Adenovirus to  
363 Wastewater Solids. *Journal of Environmental Engineering* **2018**, *144* (11), 06018008.  
364 [https://doi.org/10.1061/\(ASCE\)EE.1943-7870.0001463](https://doi.org/10.1061/(ASCE)EE.1943-7870.0001463).
- 365 (13) Gonzalez, R.; Curtis, K.; Bivins, A.; Bibby, K.; Weir, M. H.; Yetka, K.; Thompson, H.;  
366 Keeling, D.; Mitchell, J.; Gonzalez, D. COVID-19 Surveillance in Southeastern Virginia  
367 Using Wastewater-Based Epidemiology. *Water Research* **2020**, *186*, 116296.  
368 <https://doi.org/10.1016/j.watres.2020.116296>.
- 369 (14) Wolfe, M. K.; Topol, A.; Knudson, A.; Simpson, A.; White, B.; Duc, V.; Yu, A.; Li, L.; Balliet,  
370 M.; Stoddard, P.; Han, G.; Wigginton, K. R.; Boehm, A. High-Frequency, High-Throughput  
371 Quantification of SARS-CoV-2 RNA in Wastewater Settled Solids at Eight Publicly Owned  
372 Treatment Works in Northern California Shows Strong Association with COVID-19  
373 Incidence. *mSystems* **2021**, *6* (5), e00829-21. <https://doi.org/10.1128/mSystems.00829-21>.
- 374 (15) Ahmed, W.; Bertsch, P. M.; Angel, N.; Bibby, K.; Bivins, A.; Dierens, L.; Edson, J.; Ehret,  
375 J.; Gyawali, P.; Hamilton, K. A.; Hosegood, I.; Hugenholtz, P.; Jiang, G.; Kitajima, M.;  
376 Sichani, H. T.; Shi, J.; Shimko, K. M.; Simpson, S. L.; Smith, W. J. M.; Symonds, E. M.;  
377 Thomas, K. V.; Verhagen, R.; Zaugg, J.; Mueller, J. F. Detection of SARS-CoV-2 RNA in  
378 Commercial Passenger Aircraft and Cruise Ship Wastewater: A Surveillance Tool for  
379 Assessing the Presence of COVID-19 Infected Travellers. *Journal of Travel Medicine*  
380 **2020**, *27* (taaa116). <https://doi.org/10.1093/jtm/taaa116>.
- 381 (16) Whitney, O. N.; Kennedy, L. C.; Fan, V. B.; Hinkle, A.; Kantor, R.; Greenwald, H.; Crits-  
382 Christoph, A.; Al-Shayeb, B.; Chaplin, M.; Maurer, A. C.; Tjian, R.; Nelson, K. L. Sewage,  
383 Salt, Silica, and SARS-CoV-2 (4S): An Economical Kit-Free Method for Direct Capture of  
384 SARS-CoV-2 RNA from Wastewater. *Environ. Sci. Technol.* **2021**, *55* (8), 4880–4888.  
385 <https://doi.org/10.1021/acs.est.0c08129>.
- 386 (17) Duvallet, C.; Wu, F.; McElroy, K. A.; Imakaev, M.; Endo, N.; Xiao, A.; Zhang, J.; Floyd-  
387 O'Sullivan, R.; Powell, M. M.; Mendola, S.; Wilson, S. T.; Cruz, F.; Melman, T.;  
388 Sathyanarayana, C. L.; Olesen, S. W.; Erickson, T. B.; Ghaeli, N.; Chai, P.; Alm, E. J.;  
389 Matus, M. Nationwide Trends in COVID-19 Cases and SARS-CoV-2 RNA Wastewater  
390 Concentrations in the United States. *ACS EST Water* **2022**, *2* (11), 1899–1909.  
391 <https://doi.org/10.1021/acsestwater.1c00434>.
- 392 (18) Hopkins, L.; Persse, D.; Caton, K.; Ensor, K.; Schneider, R.; McCall, C.; Stadler, L. B.  
393 Citywide Wastewater SARS-CoV-2 Levels Strongly Correlated with Multiple Disease  
394 Surveillance Indicators and Outcomes over Three COVID-19 Waves. *Science of The Total*  
395 *Environment* **2023**, *855*, 158967. <https://doi.org/10.1016/j.scitotenv.2022.158967>.
- 396 (19) The White House. *Background Press Call on the Rollout of 500 Million Free Tests to*  
397 *American Homes*. [https://www.whitehouse.gov/briefing-room/press-](https://www.whitehouse.gov/briefing-room/press-briefings/2022/01/14/background-press-call-on-the-rollout-of-500-million-free-tests-to-american-homes/)  
398 [briefings/2022/01/14/background-press-call-on-the-rollout-of-500-million-free-tests-to-](https://www.whitehouse.gov/briefing-room/press-briefings/2022/01/14/background-press-call-on-the-rollout-of-500-million-free-tests-to-american-homes/)  
399 [american-homes/](https://www.whitehouse.gov/briefing-room/press-briefings/2022/01/14/background-press-call-on-the-rollout-of-500-million-free-tests-to-american-homes/) (accessed 2023-02-07).
- 400 (20) Radar, B.; Gertz, A.; Iuliano, A. D.; Gilmer, M.; Wronski, L.; Astley, C. M.; Sewalk, K.;  
401 Varrelman, T.; Cohen, J.; Parikh, R.; Reese, H. E.; Reed, C.; Brownstein, J. S. Use of At-  
402 Home COVID-19 Tests — United States, August 23, 2021–March 12, 2022. *MMWR Morb*  
403 *Mortal Wkly Rep* **2022**, *71*, 489–494. <http://dx.doi.org/10.15585/mmwr.mm7113e1>.
- 404 (21) Topol, A.; Wolfe, M.; White, B.; Wigginton, K.; Boehm, A. High Throughput Pre-Analytical  
405 Processing of Wastewater Settled Solids for SARS-CoV-2 RNA Analyses. *protocols.io*  
406 **2021**.

- 407 (22) Topol, A.; Wolfe, M.; White, B.; Wigginton, K.; Boehm, A. High Throughput SARS-CoV-2,  
408 PMMOV, and BCoV Quantification in Settled Solids Using Digital RT-PCR. *protocols.io*  
409 **2021**.
- 410 (23) Topol, A.; Wolfe, M.; Wigginton, K.; White, B.; Boehm, A. High Throughput RNA Extraction  
411 and PCR Inhibitor Removal of Settled Solids for Wastewater Surveillance of SARS-CoV-2  
412 RNA. *protocols.io* **2021**.
- 413 (24) Huisman, J. S.; Scire, J.; Caduff, L.; Fernandez-Cassi, X.; Ganesanandamoorthy, P.; Kull,  
414 A.; Scheidegger, A.; Stachler, E.; Boehm, A. B.; Hughes, B.; Knudson, A.; Topol, A.;  
415 Wigginton, K. R.; Wolfe, M. K.; Kohn, T.; Ort, C.; Stadler, T.; Julian, T. R. Wastewater-  
416 Based Estimation of the Effective Reproductive Number of SARS-CoV-2. *Environmental*  
417 *Health Perspectives* **2022**, 130 (5), 057011–1.
- 418 (25) Boehm, A. B.; Hughes, B.; Wolfe, M. K.; White, B. J.; Duong, D.; Chan-Herur, V. Regional  
419 Replacement of SARS-CoV-2 Variant Omicron BA.1 with BA.2 as Observed through  
420 Wastewater Surveillance. *Environ. Sci. Technol. Lett.* **2022**, 9 (6), 575–580.  
421 <https://doi.org/10.1021/acs.estlett.2c00266>.
- 422 (26) Bergman, A.; Sella, Y.; Agre, P.; Casadevall, A. Oscillations in U.S. COVID-19 Incidence  
423 and Mortality Data Reflect Diagnostic and Reporting Factors. *mSystems* **2020**, 5 (4),  
424 e00544-20. <https://doi.org/10.1128/mSystems.00544-20>.
- 425 (27) McClary-Gutierrez, J. S.; Aanderud, Z. T.; Al-faliti, M.; Duvallet, C.; Gonzalez, R.; Guzman,  
426 J.; Holm, R. H.; Jahne, M. A.; Kantor, R. S.; Katsivelis, P.; Kuhn, K. G.; Langan, L. M.;  
427 Mansfeldt, C.; McLellan, S. L.; Mendoza Grijalva, L. M.; Murnane, K. S.; Naughton, C. C.;  
428 Packman, A. I.; Paraskevopoulos, S.; Radniecki, T. S.; Roman, F. A.; Shrestha, A.;  
429 Stadler, L. B.; Steele, J. A.; Swalla, B. M.; Vikesland, P.; Wartell, B.; Wilusz, C. J.; Wong,  
430 J. C. C.; Boehm, A. B.; Halden, R. U.; Bibby, K.; Delgado Vela, J. Standardizing Data  
431 Reporting in the Research Community to Enhance the Utility of Open Data for SARS-CoV-  
432 2 Wastewater Surveillance. *Environ. Sci.: Water Res. Technol.* **2021**, 7 (9), 1545–1551.  
433 <https://doi.org/10.1039/D1EW00235J>.
- 434 (28) Simpson, A.; Topol, A.; White, B.; Wolfe, M. K.; Wigginton, K.; Boehm, A. B. Effect of  
435 Storage Conditions on SARS-CoV-2 RNA Quantification in Wastewater Solids. *PeerJ*  
436 **2021**, 9, e11933. <https://doi.org/10.7717/peerj.11933>.
- 437 (29) The dMIQE Group; Huggett, J. F. The Digital MIQE Guidelines Update: Minimum  
438 Information for Publication of Quantitative Digital PCR Experiments for 2020. *Clinical*  
439 *Chemistry* **2020**, 66 (8), 1012–1029. <https://doi.org/10.1093/clinchem/hvaa125>.
- 440 (30) Borchardt, M. A.; Boehm, A. B.; Salit, M.; Spencer, S. K.; Wigginton, K. R.; Noble, R. T.  
441 The Environmental Microbiology Minimum Information (EMMI) Guidelines: QPCR and  
442 DPCR Quality and Reporting for Environmental Microbiology. *Environ. Sci. Technol.* **2021**,  
443 55 (15), 10210–10223. <https://doi.org/10.1021/acs.est.1c01767>.
- 444 (31) Feng, S.; Roguet, A.; McClary-Gutierrez, J. S.; Newton, R. J.; Kloczko, N.; Meiman, J. G.;  
445 McLellan, S. L. Evaluation of Sampling, Analysis, and Normalization Methods for SARS-  
446 CoV-2 Concentrations in Wastewater to Assess COVID-19 Burdens in Wisconsin  
447 Communities. *ACS ES&T Water* **2021**, 1 (8), 1955–1965.  
448 <https://doi.org/10.1021/acsestwater.1c00160>.
- 449 (32) Puhach, O.; Meyer, B.; Eckerle, I. SARS-CoV-2 Viral Load and Shedding Kinetics. *Nature*  
450 *Reviews Microbiology* **2022**. <https://doi.org/10.1038/s41579-022-00822-w>.
- 451 (33) Daou, M.; Kannout, H.; Khalili, M.; Almarei, M.; Alhashami, M.; Alhalwachi, Z.; Alshamsi,  
452 F.; Tahseen Al Bataineh, M.; Azzam Kayasseh, M.; Al Khajeh, A.; Hasan, S. W.; Tay, G.  
453 K.; Feng, S. F.; Ruta, D.; Yousef, A. F.; Alsafar, H. S.; on behalf of the UAE COVID-19  
454 Collaborative Partnership. Analysis of SARS-CoV-2 Viral Loads in Stool Samples and  
455 Nasopharyngeal Swabs from COVID-19 Patients in the United Arab Emirates. *PLOS ONE*  
456 **2022**, 17 (9), e0274961. <https://doi.org/10.1371/journal.pone.0274961>.
- 457 (34) Anjos, D.; Fiaccadori, F. S.; Servian, C. do P.; da Fonseca, S. G.; Guilarde, A. O.; Borges,

458 M. A. S. B.; Franco, F. C.; Ribeiro, B. M.; Souza, M. SARS-CoV-2 Loads in Urine, Sera  
459 and Stool Specimens in Association with Clinical Features of COVID-19 Patients. *Journal*  
460 *of Clinical Virology Plus* **2022**, 2 (1), 100059. <https://doi.org/10.1016/j.jcvp.2021.100059>.  
461 (35) Prasek, S. M.; Pepper, I. L.; Innes, G. K.; Slinski, S.; Betancourt, W. Q.; Foster, A. R.;  
462 Yaglom, H. D.; Porter, W. T.; Engelthaler, D. M.; Schmitz, B. W. Variant-Specific SARS-  
463 CoV-2 Shedding Rates in Wastewater. *Science of The Total Environment* **2023**, 857,  
464 159165. <https://doi.org/10.1016/j.scitotenv.2022.159165>.

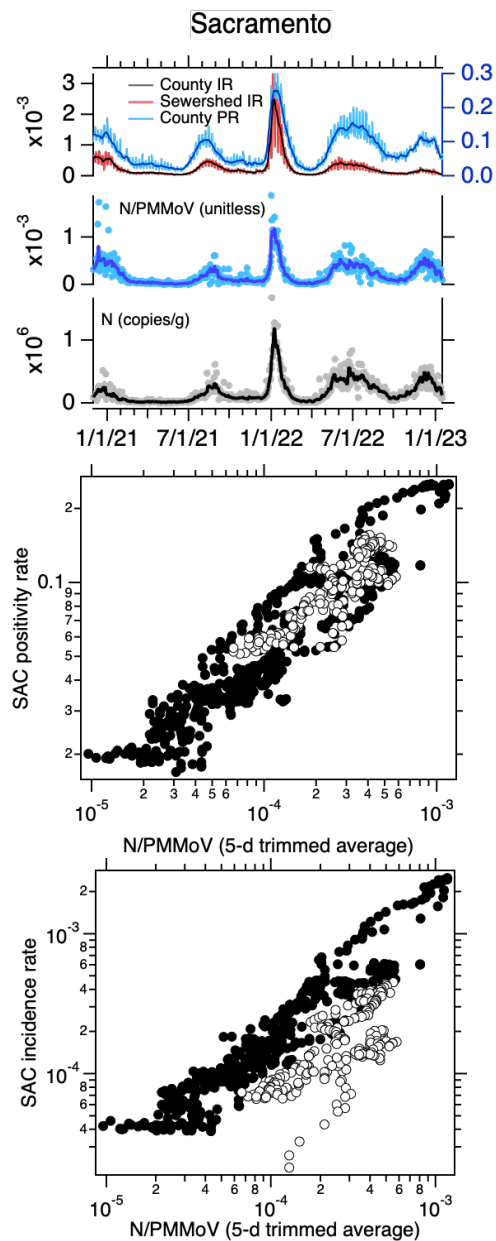

Figure 1. Top panel. Sacramento (SAC) time series of concentrations of N and N/PMMoV in wastewater, incidence rates, and positivity rates between 1 December 2020 until 16 January 2023. The solid lines represent 5-d trimmed averages for the wastewater data, and 7-d moving averages for the incidence and positivity rates. The county-aggregated and sewershed-aggregated incidence rate data fall almost directly on top of each other, obscuring the view of both. The scales for incidence and positivity rates are on the left and right axes, respectively. Middle and bottom panels. County-aggregated (Sacramento County, SAC) positivity rate and incidence rate versus 5-d trimmed N/PMMoV; white symbols are data collected on and after 1 May 2022.

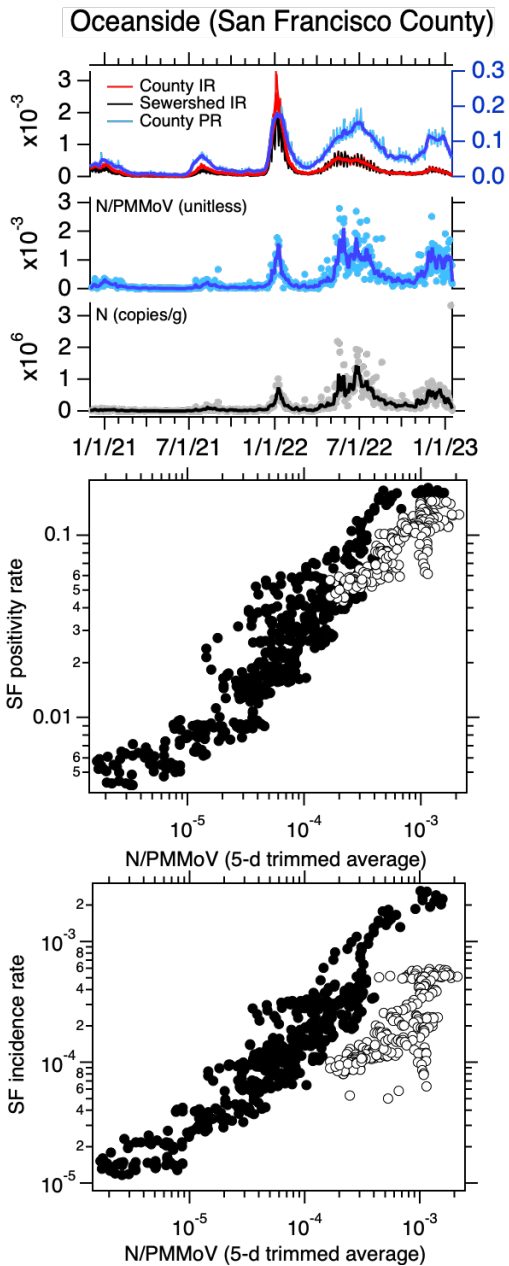

Figure 2. Top panel. Oceanside (OS) time series of concentrations of N and N/PMMoV in wastewater, incidence rates, and positivity rates between 1 December 2020 until 16 January 2023. The solid lines represent 5-d trimmed averages for the wastewater data, and 7-d moving averages for the incidence and positivity rates. The county-aggregated and sewershed-aggregated incidence rate data fall almost directly on top of each other, obscuring the view of both. The scales for incidence and positivity rates are on the left and right axes, respectively. Middle and bottom panels. County-aggregated (San Francisco County, SF) positivity rate and incidence rate versus 5-d trimmed N/PMMoV; white symbols are data collected on and after 1 May 2022.



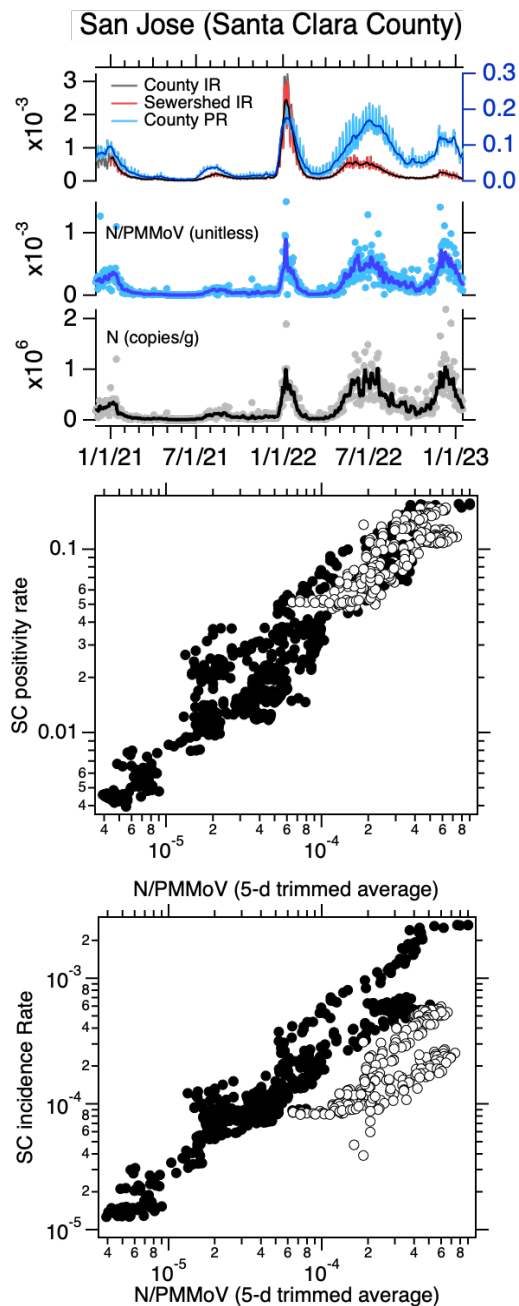

Figure 3. Top panel. San Jose (SJ) time series of concentrations of N and N/PMMoV in wastewater, incidence rates, and positivity rates between 1 December 2020 until 16 January 2023. The solid lines represent 5-d trimmed averages for the wastewater data, and 7-d moving averages for the incidence and positivity rates. The county-aggregated and sewershed-aggregated incidence rate data fall almost directly on top of each other, obscuring the view of both. The scales for incidence and positivity rates are on the left and right axes, respectively. Middle and bottom panels. County-aggregated (Santa Clara County, SC) Positivity rate and incidence rate versus 5-d trimmed N/PMMoV; white symbols are data collected on and after 1 May 2022.

Table 1. Coefficients for the model  $Y = b + m \cdot X + n \cdot D + k \cdot (D \cdot X)$  presented as equation 1 in the text where  $X$  is  $\log_{10}$ -transformed 5-d trimmed N/PMMoV and  $Y$  is  $\log_{10}$ -transformed incidence rate. Adjusted R-square values and p-values for the model are provided, as well as the F statistic (and the degrees of freedom, DF). Coefficient values with standard errors are reported as well as p-values in parentheses. With Bonferroni corrections,  $p$  must be less than 0.0013 for  $\alpha = 0.05$ . If  $n$  is significantly different from 0, then the intercept for the linear relationship between  $X$  and  $Y$  before and after 1 May 2022 is different and equal to  $b + n$ . If  $k$  is significantly different from 0, then the slope for the linear relationship between  $X$  and  $Y$  is different before and after 1 May 2022 and equal to  $m + k$ .

| POTW | b                                     | m                                   | n                                     | k                                   | Adjusted R <sup>2</sup>       | F-statistic             |
|------|---------------------------------------|-------------------------------------|---------------------------------------|-------------------------------------|-------------------------------|-------------------------|
| SJ   | 0.29±0.07<br>(1.3×10 <sup>-5</sup> )  | 0.96±0.02<br>(<10 <sup>-100</sup> ) | -0.96±0.18<br>(<10 <sup>-7</sup> )    | -0.12±0.05<br>(0.014)               | 0.86 (10 <sup>-15</sup> )     | 1545 on 3<br>and 773 DF |
| OS   | -1.22±0.05<br>(<10 <sup>-100</sup> )  | 0.65±0.01<br>(<10 <sup>-100</sup> ) | -1.51±0.22<br>(<10 <sup>-11</sup> )   | -0.29 ±0.06<br>(<10 <sup>-5</sup> ) | 0.81<br>(<10 <sup>-15</sup> ) | 1070 on 3<br>and 733 DF |
| SAC  | -0.26±0.06<br>(2.9×10 <sup>-5</sup> ) | 0.88±0.02<br>(<10 <sup>-100</sup> ) | -0.61±0.15<br>(6.7×10 <sup>-5</sup> ) | -0.067±0.04<br>(0.10)               | 0.83<br>(<10 <sup>-15</sup> ) | 1270 on 3<br>and 765 DF |
