# Supplementary material for: Divergence of wastewater SARS-CoV-2 and reported laboratory-confirmed COVID-19 incident case data coincident with wide-spread availability of at-home COVID-19 antigen tests
Source: bioRxiv or medRxiv preprint supplement (doi:10.1101/2023.02.09.23285716), 2023-02-13
Supplement: Supplementary file [file media-1.pdf]

1 Supporting Information

2 for

3 Divergence of wastewater SARS-CoV-2 and reported laboratory-confirmed COVID-19 incident  
4 case data coincident with wide-spread availability of at-home COVID-19 antigen tests

5  
6 Alexandria B. Boehm<sup>1\*</sup>, Marlene K. Wolfe<sup>2</sup>, Bradley J. White<sup>3</sup>, Bridgette Hughes<sup>3</sup>, Dorothea  
7 Duong<sup>3</sup>

- 8  
9  
10 1. Department of Civil & Environmental Engineering, School of Engineering and Doerr  
11 School of Sustainability, Stanford University, 473 Via Ortega, Stanford, CA, USA 94305  
12 2. Gangarosa Department of Environmental Health, Rollins School of Public Health, Emory  
13 University, 1518 Clifton Rd, Atlanta, GA, USA, 30322  
14 3. Verily Life Sciences LLC, South San Francisco, CA, USA, 94080

15  
16  
17  
18 \* Author to whom correspondence should be addressed. Email: [aboehm@stanford.edu](mailto:aboehm@stanford.edu), Tel:  
19 650-724-9128  
20

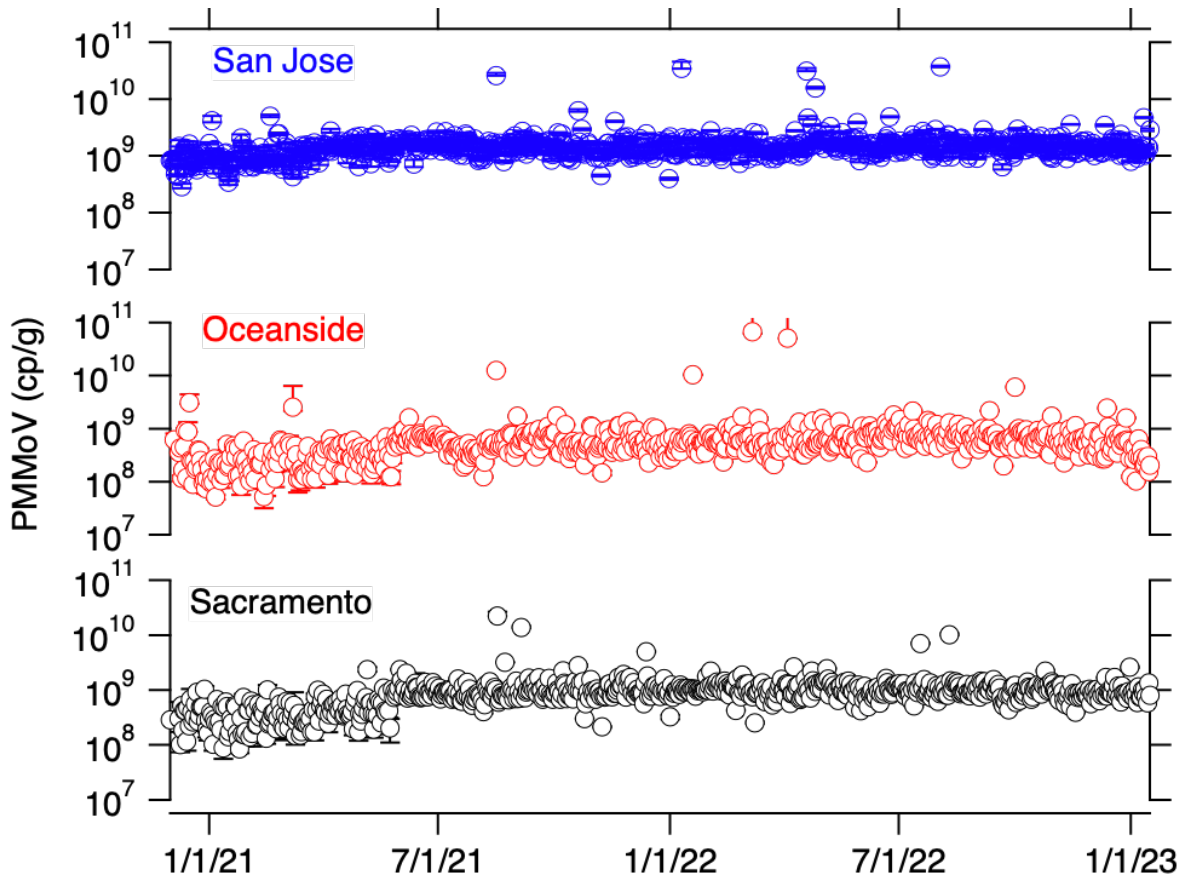

21  
 22 Figure S1. PMMoV concentrations in units of copies per gram dry weight and associated errors  
 23 as represented by standard deviations. Errors are difficult to see in some cases because the  
 24 size of the error bars are smaller than the symbol.  
 25

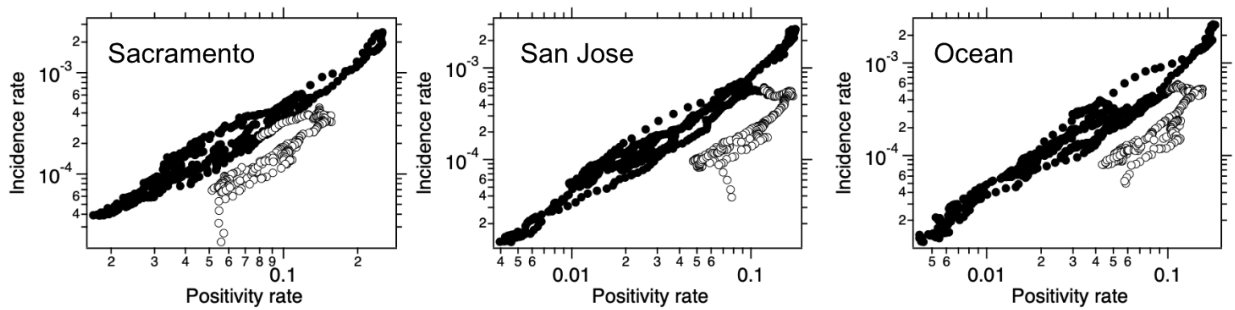

26  
 27 Figure S2. Relationship between incidence rate and positivity rate for the three POTWs. Here  
 28 incidence rate and positivity rate are reported as fractions and the rates are the county-  
 29 aggregated rates. Symbols colored black indicate data collected before 1 May 2022 and  
 30 symbols colored white indicate data collected on or after 1 May 2022.  
 31  
 32  
 33

34  
 35  
 36  
 37  
 38  
 39  
 40  
 41  
 42  
 43  
 44  
 45  
 46  
 47

Table S1. Coefficients for the model  $Y = b + m \cdot X + n \cdot D + k \cdot (D \cdot X)$  presented as equation 1 in the text where  $X$  is  $\log_{10}$ -transformed positivity rate and  $Y$  is  $\log_{10}$ -transformed incidence rate. Adjusted R-square values and p-values for the model are provided, as well as the F statistic (and the degrees of freedom, DF). Coefficient values with standard errors are reported as well as p-values in parentheses. With Bonferroni corrections,  $p$  must be less than 0.0013 for  $\alpha = 0.05$ . If  $n$  is significantly different from 0, then the intercept for the linear relationship between  $X$  and  $Y$  before and after 1 May 2022 is different and equal to  $b + n$ . If  $k$  is significantly different from 0, then the slope for the linear relationship between  $X$  and  $Y$  is different before and after 1 May 2022 and equal to  $m + k$ .

| POTW | b                 | m                | n                            | k                        | Adjusted R2             | F-Statistic                |
|------|-------------------|------------------|------------------------------|--------------------------|-------------------------|----------------------------|
| SJ   | -1.83±0.02<br>(0) | 1.27±0.01<br>(0) | -0.32±0.06<br>( $<10^{-7}$ ) | 0.19±0.05<br>(0.00016)   | 0.92<br>( $<10^{-15}$ ) | 3188 on<br>3 and<br>773 DF |
| OS   | -2.21±0.02<br>(0) | 1.09±0.01<br>(0) | -0.64±0.11<br>( $<10^{-8}$ ) | -0.17 ±0.09<br>(0.07)    | 0.90<br>( $<10^{-15}$ ) | 2360 on<br>3 and<br>733 DF |
| SAC  | -1.91±0.02<br>(0) | 1.43±0.02<br>(0) | -0.15±0.05<br>(0.0015)       | 0.23±0.04 ( $<10^{-6}$ ) | 0.93<br>( $<10^{-15}$ ) | 3548 on<br>3 and<br>765 DF |

48  
 49
